# Supplementary material
Source: Springer Nature journal article supplement (https://www.springermedizin.de/resource/supplementary/12877_2014_1059_MOESM1_ESM.pdf/9440728)
Supplement: MOESM1 [file 9440728]

## Enrollment

Assessed for eligibility (n=370)

Excluded (n=18)

- ◆ Not meeting inclusion criteria (n=13)
- ◆ Declined to participate (n=5)
- ◆ Other reasons (n=0)

Randomized (n=352)

## Allocation

Allocated to intervention (n=176)

- ◆ Received allocated intervention (n=165)
- ◆ Did not receive complete allocated intervention (received only medication review) (n=11)

Allocated to control (n= 176)

- ◆ Received usual care (n= 176)
- ◆ Did not receive usual care (n=0)

## Follow-Up (3 & 18 month)

Lost to follow-up (give reasons) (n= )

Discontinued intervention (give reasons) (n= )

Lost to follow-up (give reasons) (n= )

Discontinued intervention (give reasons) (n= )

## Analysis

Analysed (n= )

- ◆ Excluded from analysis (give reasons) (n= )

Analysed (n= )

- ◆ Excluded from analysis (give reasons) (n= )
